# Supplementary material for: Differential contributions of choline phosphotransferases CPT1 and CEPT1 to the biosynthesis of choline phospholipids
Source: PubMed Central journal article supplement (PMC8387743; doi:10.1016/j.jlr.2021.100100), 2021-07-29
Supplement: mmc1.pdf [file mmc1.pdf]

## A *CPT1*-KO

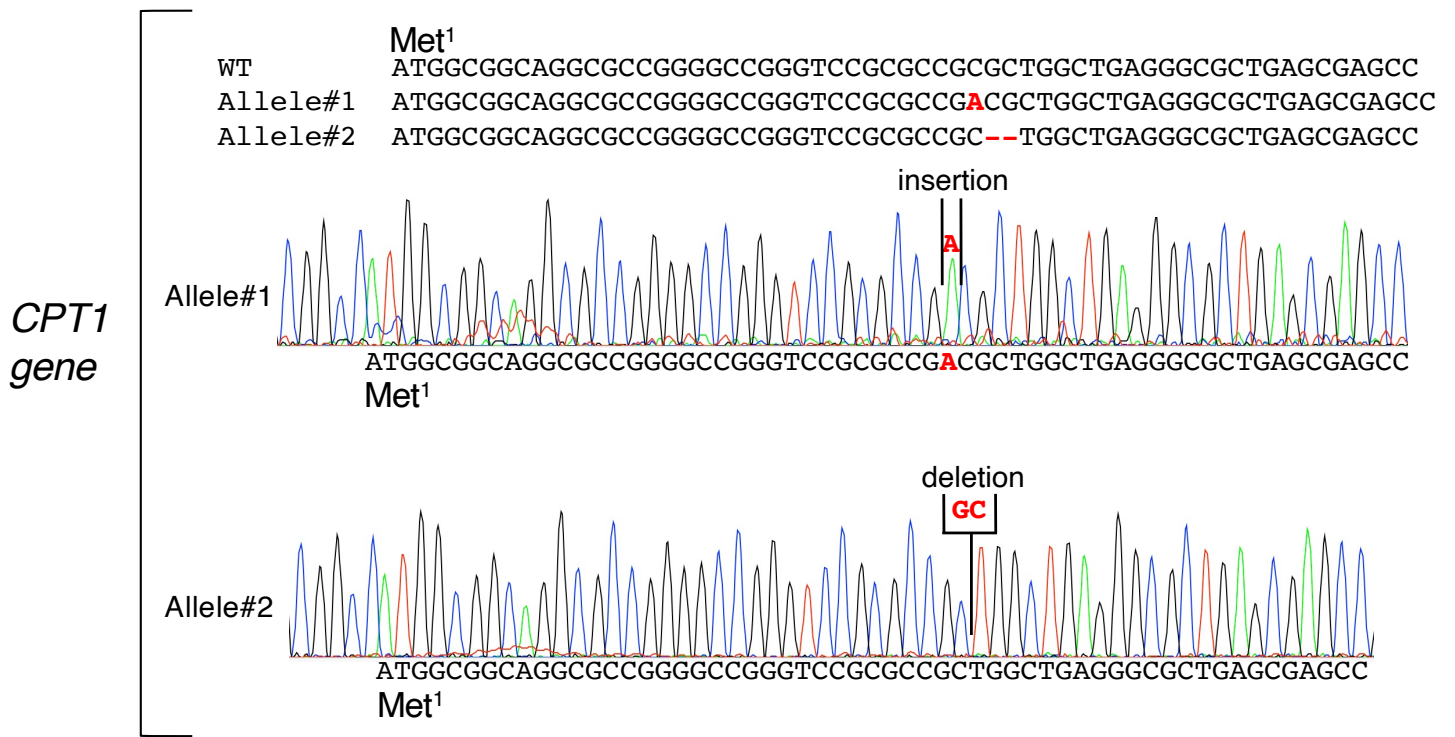

## B DKO

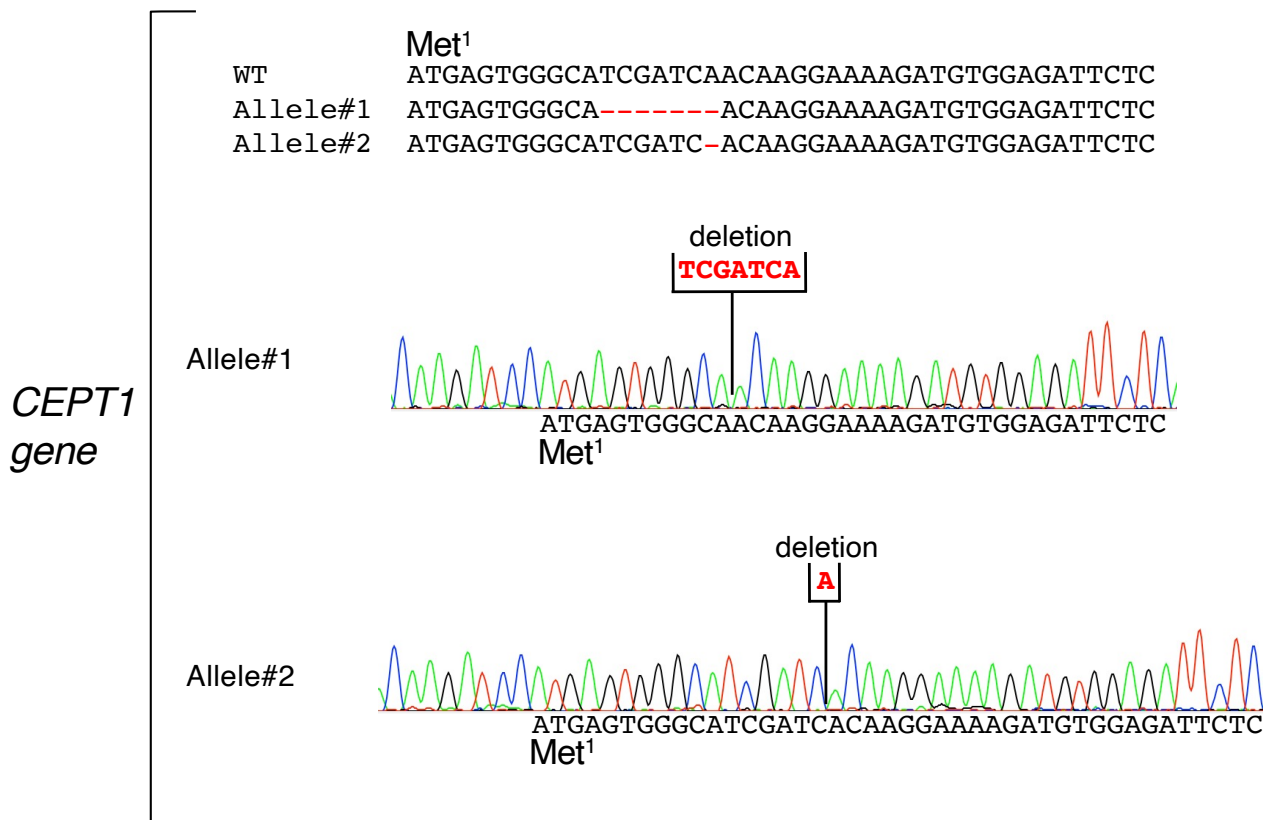

### Supplemental Fig. S1. DNA sequences of *CPT1* and *CEPT1* genes in *CPT1*-KO and DKO cells.

Alignment of genome sequences between WT and *CPT1*-KO (A) and DKO (B) cells. DKO cells were generated by introducing a vector containing *CEPT1* guide RNA into *CPT1*-KO cells. The position of the first methionine is shown as Met<sup>1</sup>. Deleted and inserted DNA sequences are shown by dashed lines and red bold, respectively. Waveform data are shown below the alignments. The DNA sequence of the *CEPT1* gene in *CEPT1*-KO cells was described in our previous study (16).

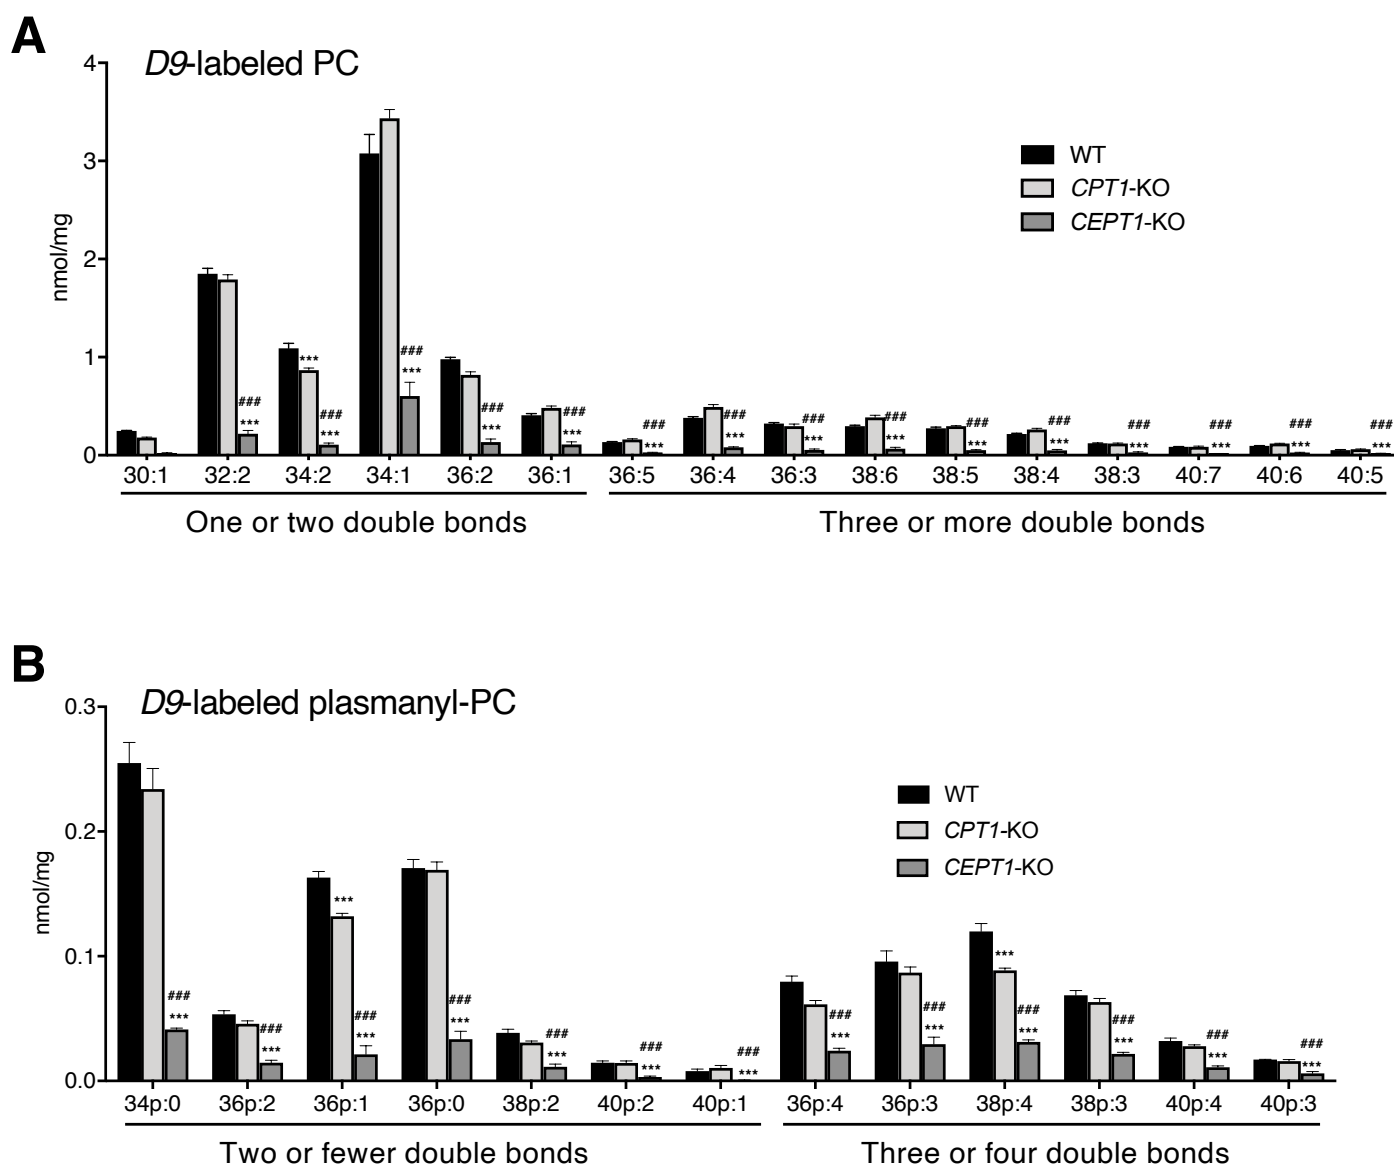

**Supplemental Fig. S2. The *de novo* biosynthesis of PC and plasmanyl-PC from *d9*-labeled choline via the CDP-choline pathway.**

WT, *CPT1*-KO, or *CEPT1*-KO cells were incubated with *d9*-labeled choline for 2 hours. After extraction, the levels of *d9*-labeled PC (A) and plasmanyl-PC (B) molecular species were quantified using LC-MS/MS. The lipid amount was normalized by the amount of total cellular proteins. Data are means  $\pm$  S.D. from three independent culture dishes. \*\* indicates  $P < 0.001$  as compared with WT. #### indicates  $P < 0.001$  as compared with *CPT1*-KO. Statistical significance was assessed using one-way ANOVA with Dunnett's post hoc test.

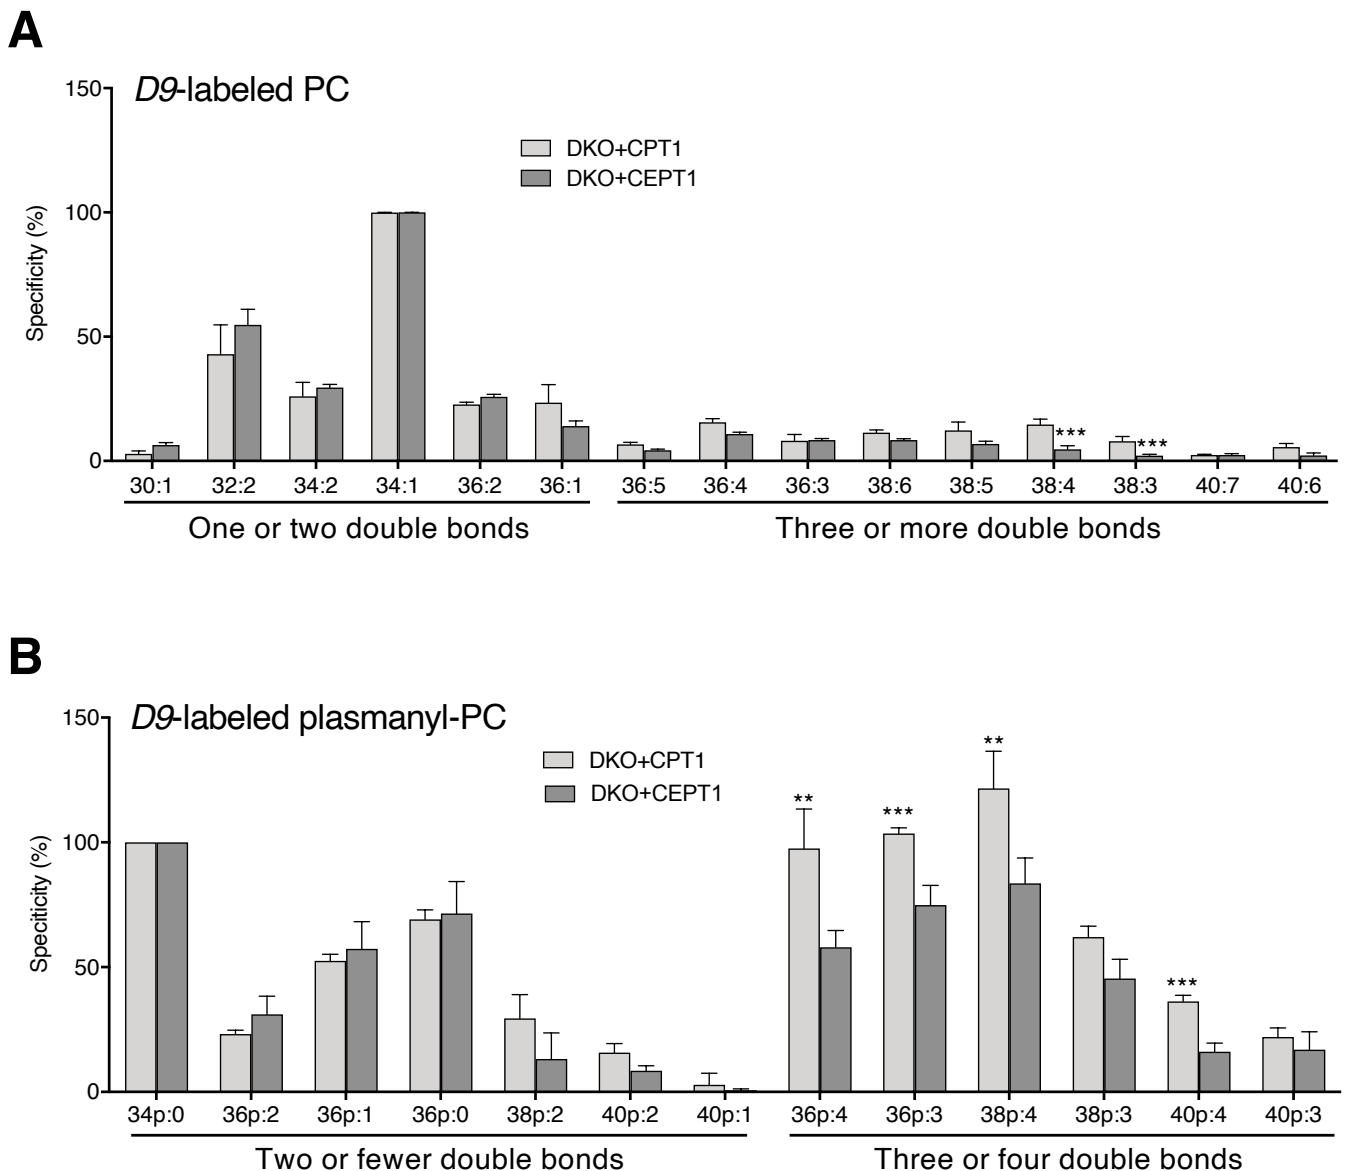

**Supplemental Fig. S3. Specificity for the *de novo* biosynthesis of choline PL molecular species in CPT1- or CEPT1-reintroduced DKO cells.**

DKO cells transfected with CPT1 (DKO+CPT1) or CEPT1 (DKO+CEPT1) were incubated with *d9*-labeled choline for 4 hours. After extraction, the levels of *d9*-labeled PC and plasmalogen-PC molecular species were quantified using LC-MS/MS. The relative values of each PC and plasmalogen-PC molecular species to 34:1 (A) and 34p:0 (B), respectively, were calculated. Data are means  $\pm$  S.D. from three independent culture dishes. \*\* and \*\*\* indicates  $P < 0.01$  and  $P < 0.001$  as compared with DKO+CEPT1 determined using the Student's t-test.

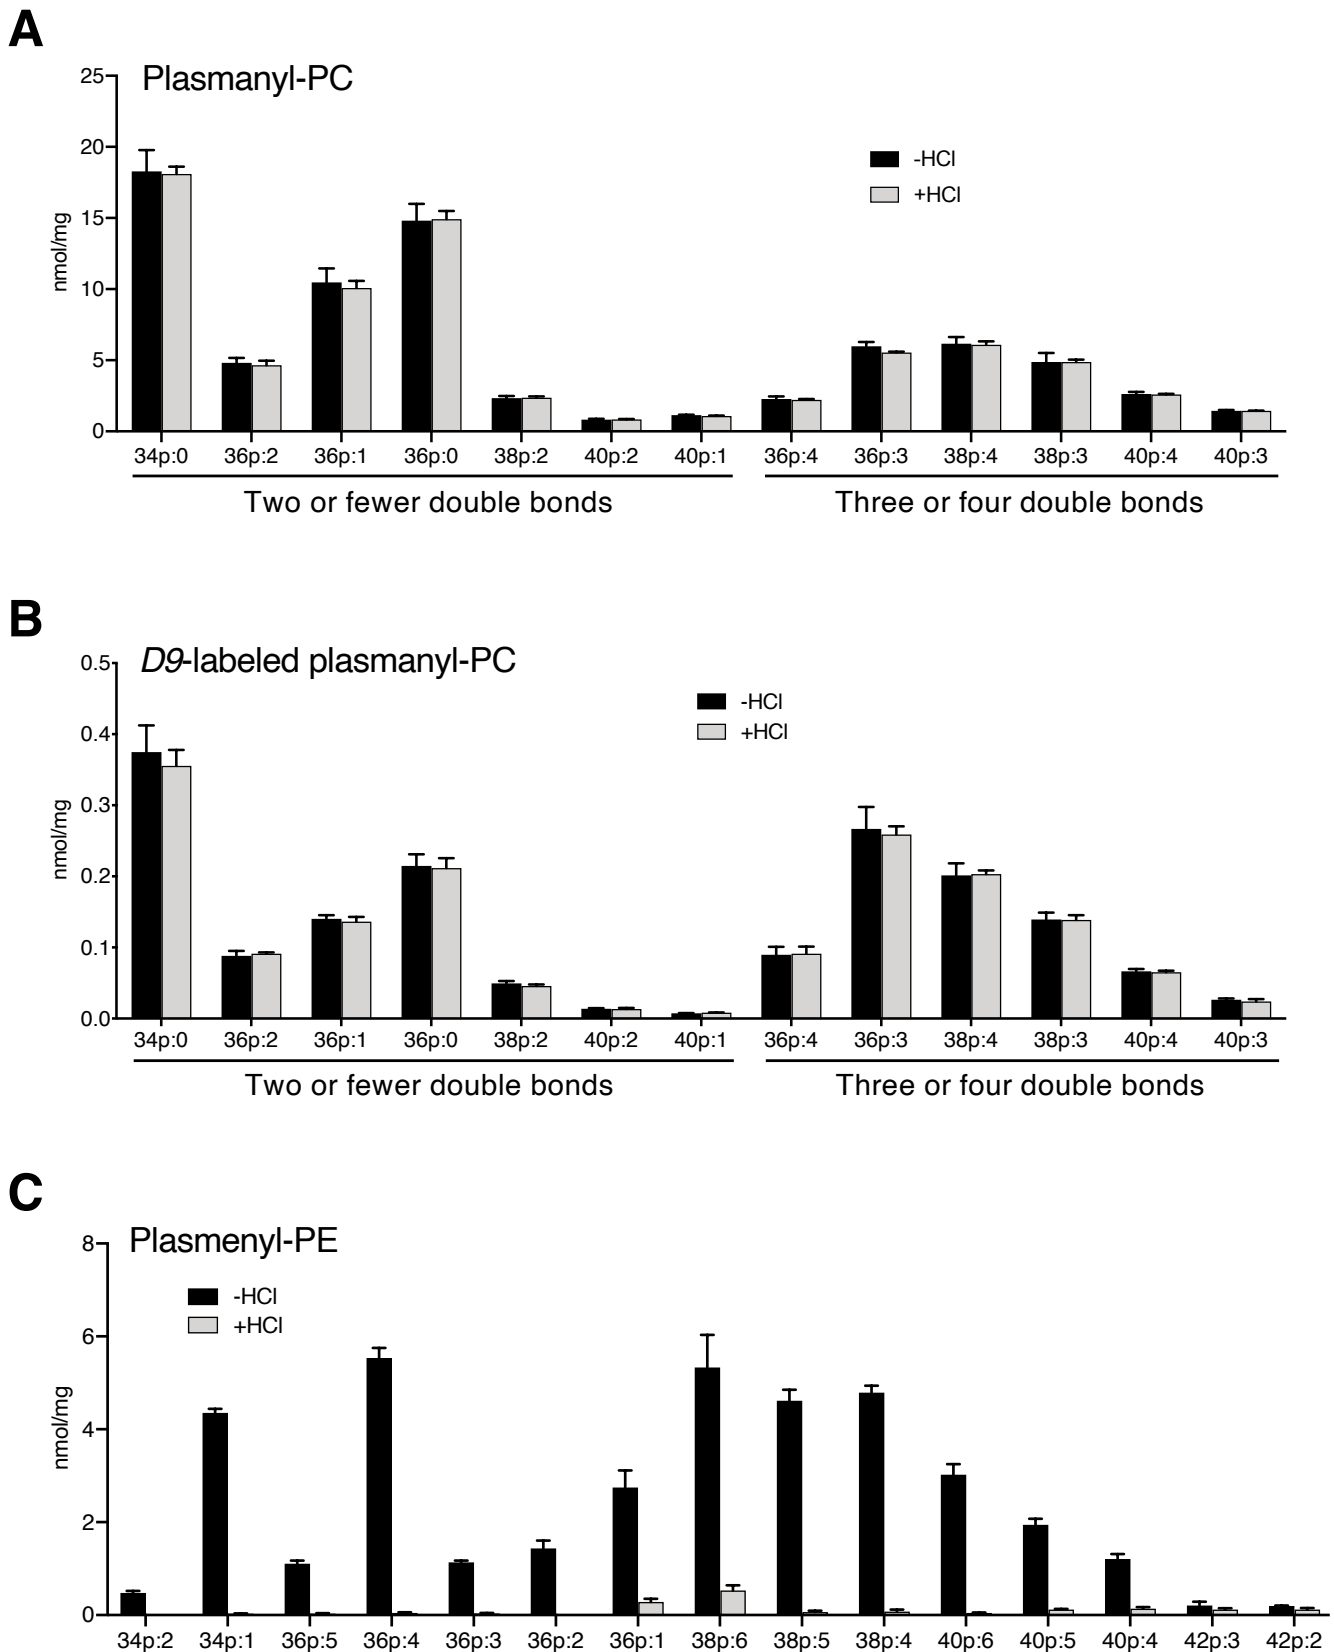

**Supplemental Fig. S4. Treatment of lipid samples with HCl to remove PLs containing the alkenyl - group.**

HEK293 cells were incubated with *d9*-labeled choline for 2 hours. After extraction, the lipids were treated with 0.15 N HCl at room temperature for 2 hours. The levels of plasmanyln-PC (A), *d9*-labeled plasmanyln-PC, and plasmenyln-PE molecular species (C) were quantified using LC-MS/MS.

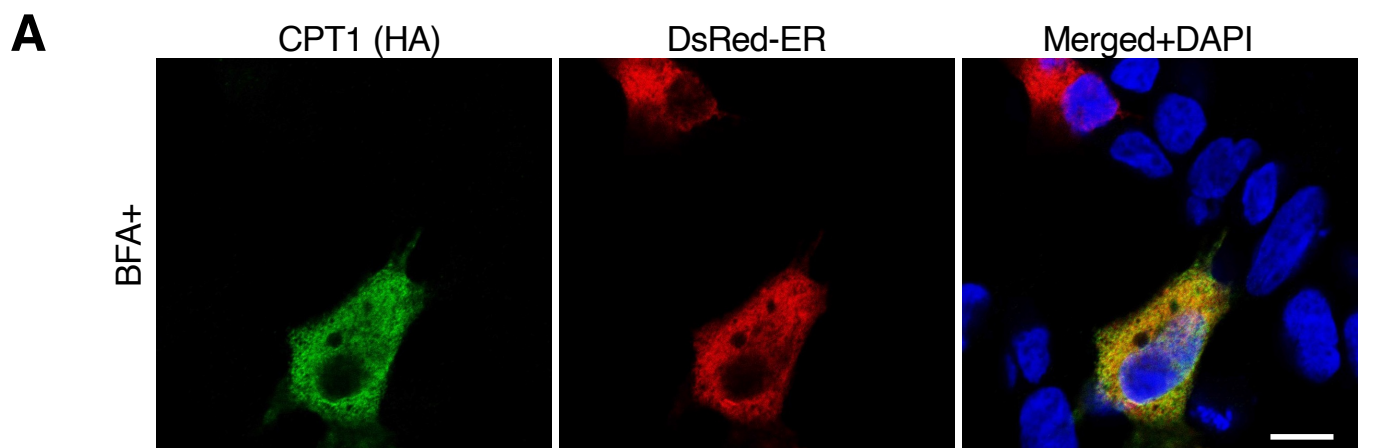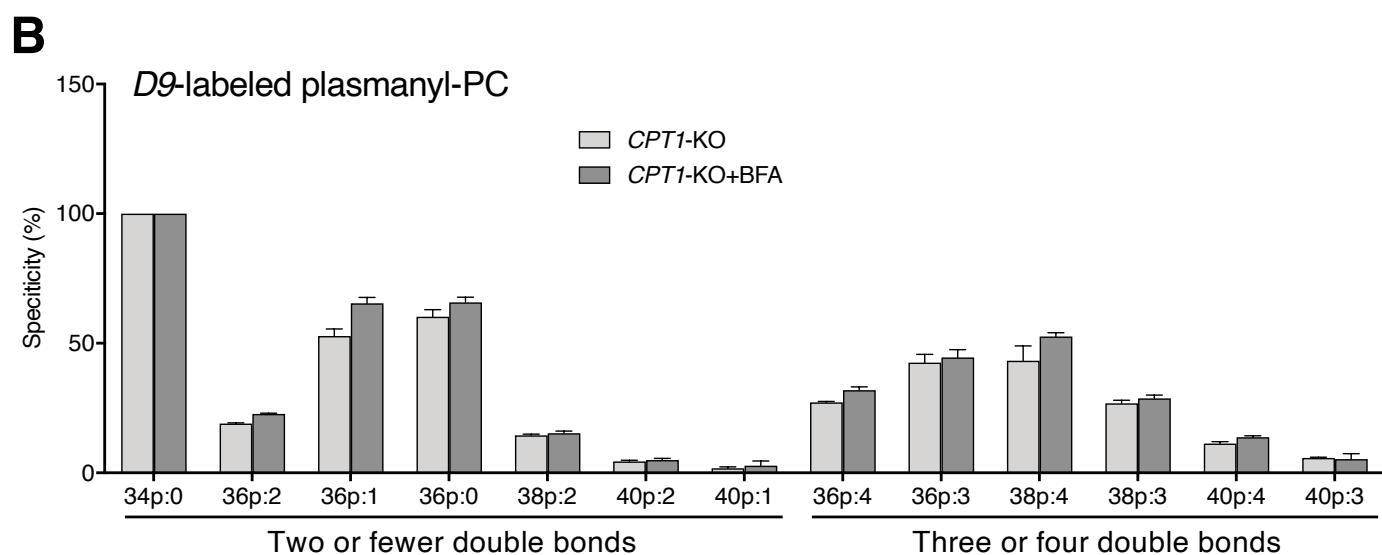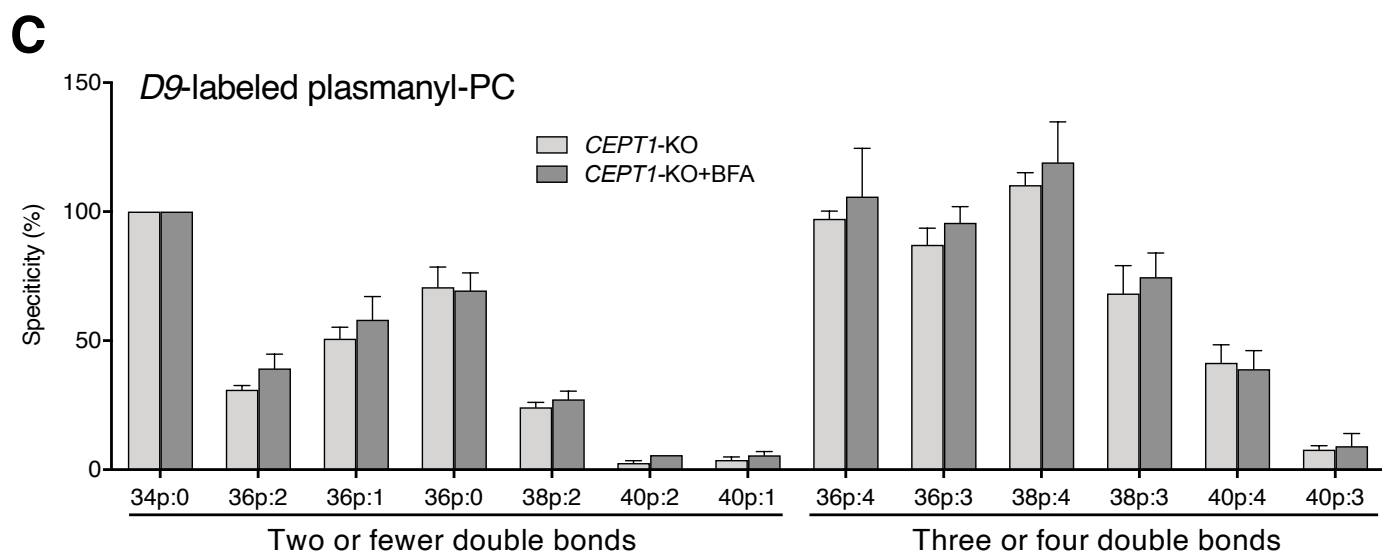

**Supplemental Fig. S5. Effect of BFA on the specificity of the *de novo* biosynthesis of plasmanyl-PC molecular species in *CPT1*- or *CEPT1*-KO cells.**

(A) Redistribution of HA-tagged CPT1 (green) to the ER after the BFA treatment (20  $\mu$ g/ml for 4 hours). The ER was labeled with pDsRed-ER vector (red). Nuclei were stained with DAPI (blue). Bars indicate 10  $\mu$ m. After pre-treatment with or without BFA for 2 hours, *CPT1*-KO (B) or *CEPT1*-KO (C) cells were incubated with *d9*-labeled choline for 2 hours in the presence or absence of BFA. After extraction, the levels of *d9*-labeled plasmanyl-PC molecular species were quantified using LC-MS/MS. The relative values of each plasmanyl-PC molecular species to 34p:0 were calculated and shown.

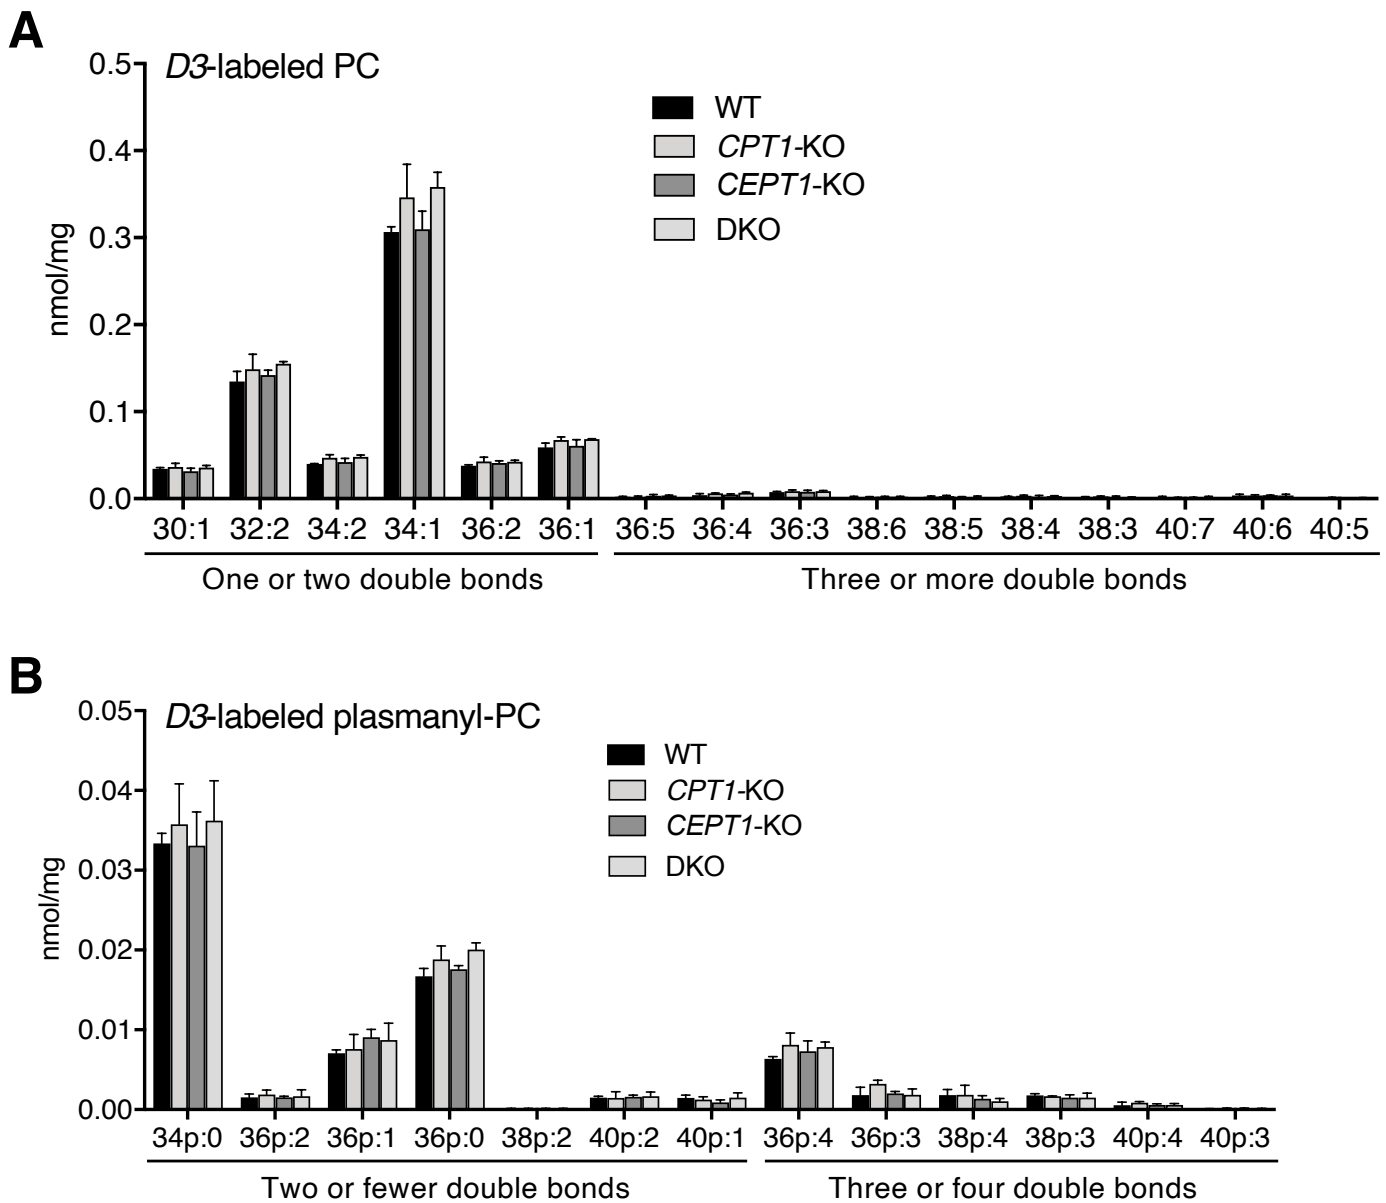

**Supplemental Fig. S6. The *de novo* biosynthesis of PC and plasmanyl-PC from deuterium-labeled choline via the PE methylation pathway.**

WT, *CPT1*-KO, *CEPT1*-KO, or DKO cells were incubated with *d9*-labeled choline for 2 hours. After extraction, the levels of *d3*-labeled PC (A) and plasmanyl-PC (B) molecular species were quantified using LC-MS/MS. The lipid amount was normalized by the amount of total cellular proteins. Data are means  $\pm$  S.D. from three independent culture dishes.

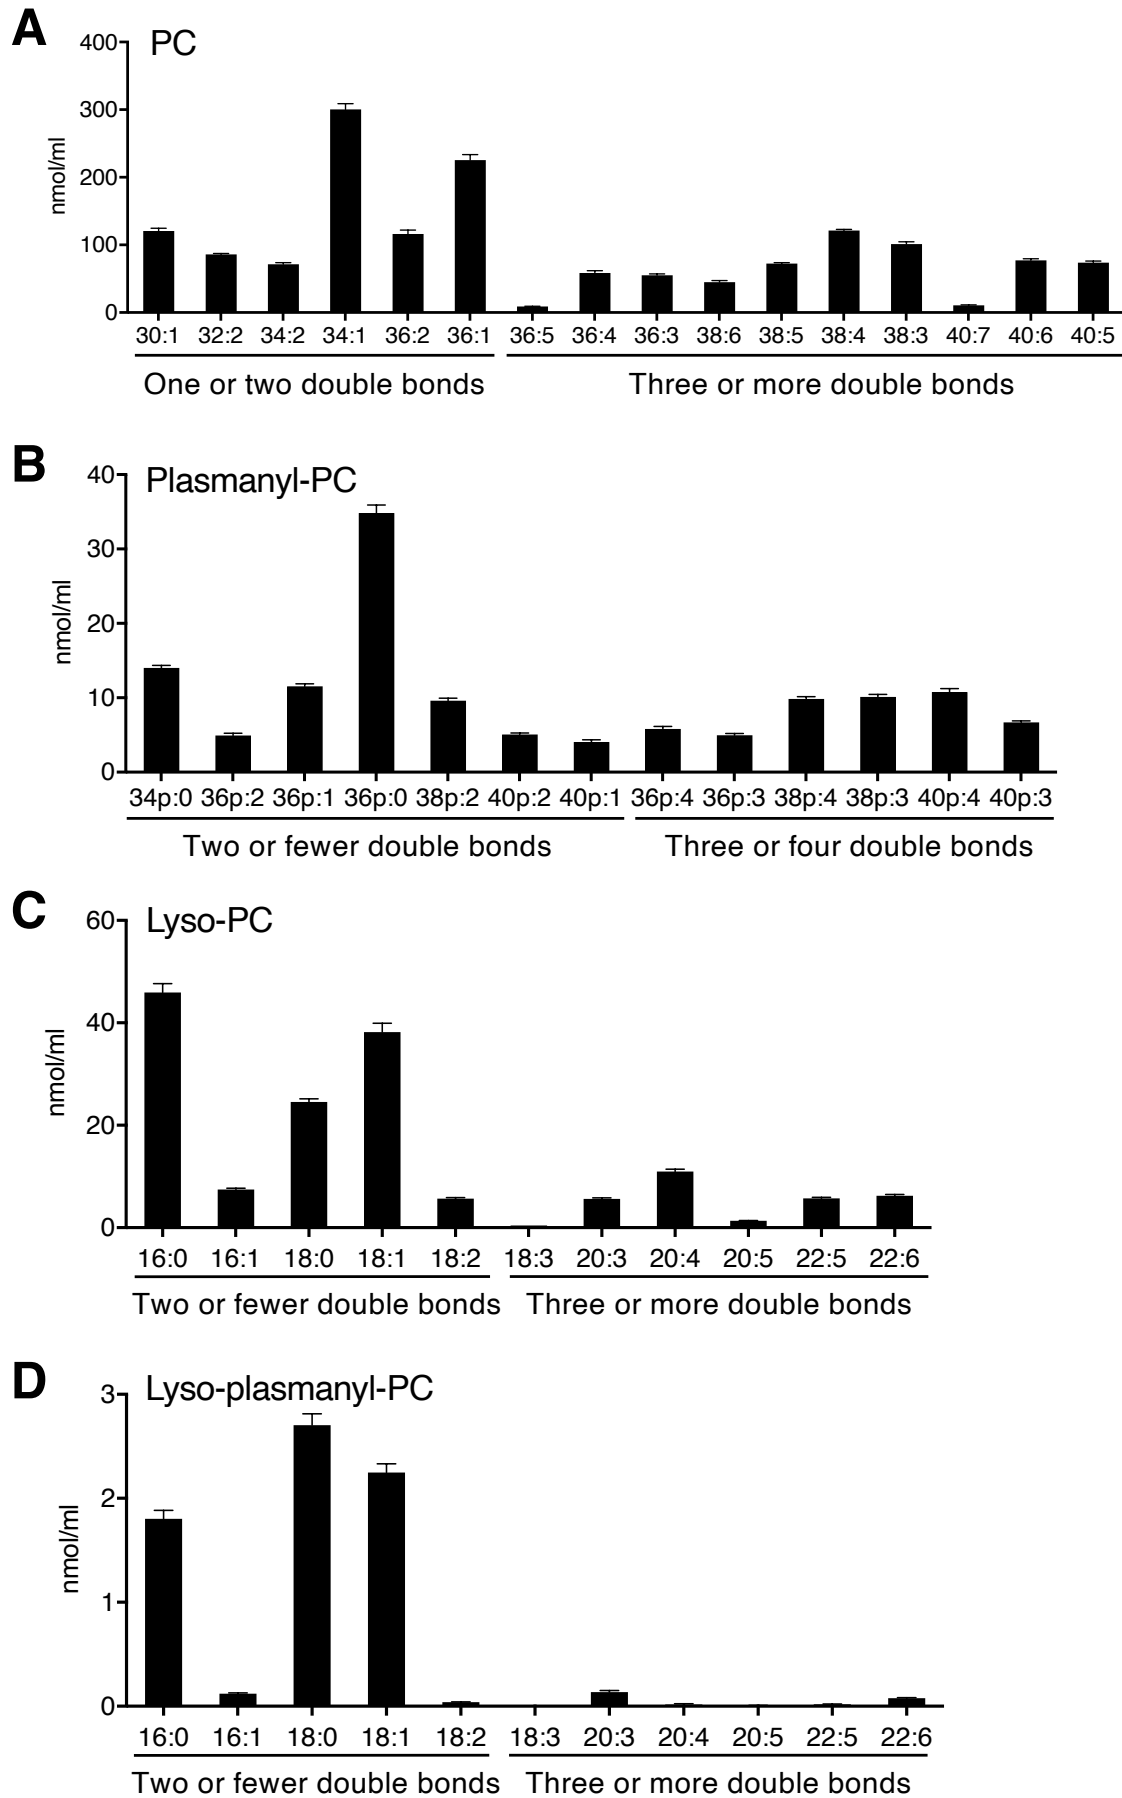

**Supplemental Fig. S7. The levels of choline PLs in FBS.**

The levels of PC (A), plasmalogen-PC (B), lyso-PC (C), and lyso-plasmalogen-PC (D) molecular species in FBS were quantified using LC-MS/MS. Data are means  $\pm$  S.D. from three independent experiments.

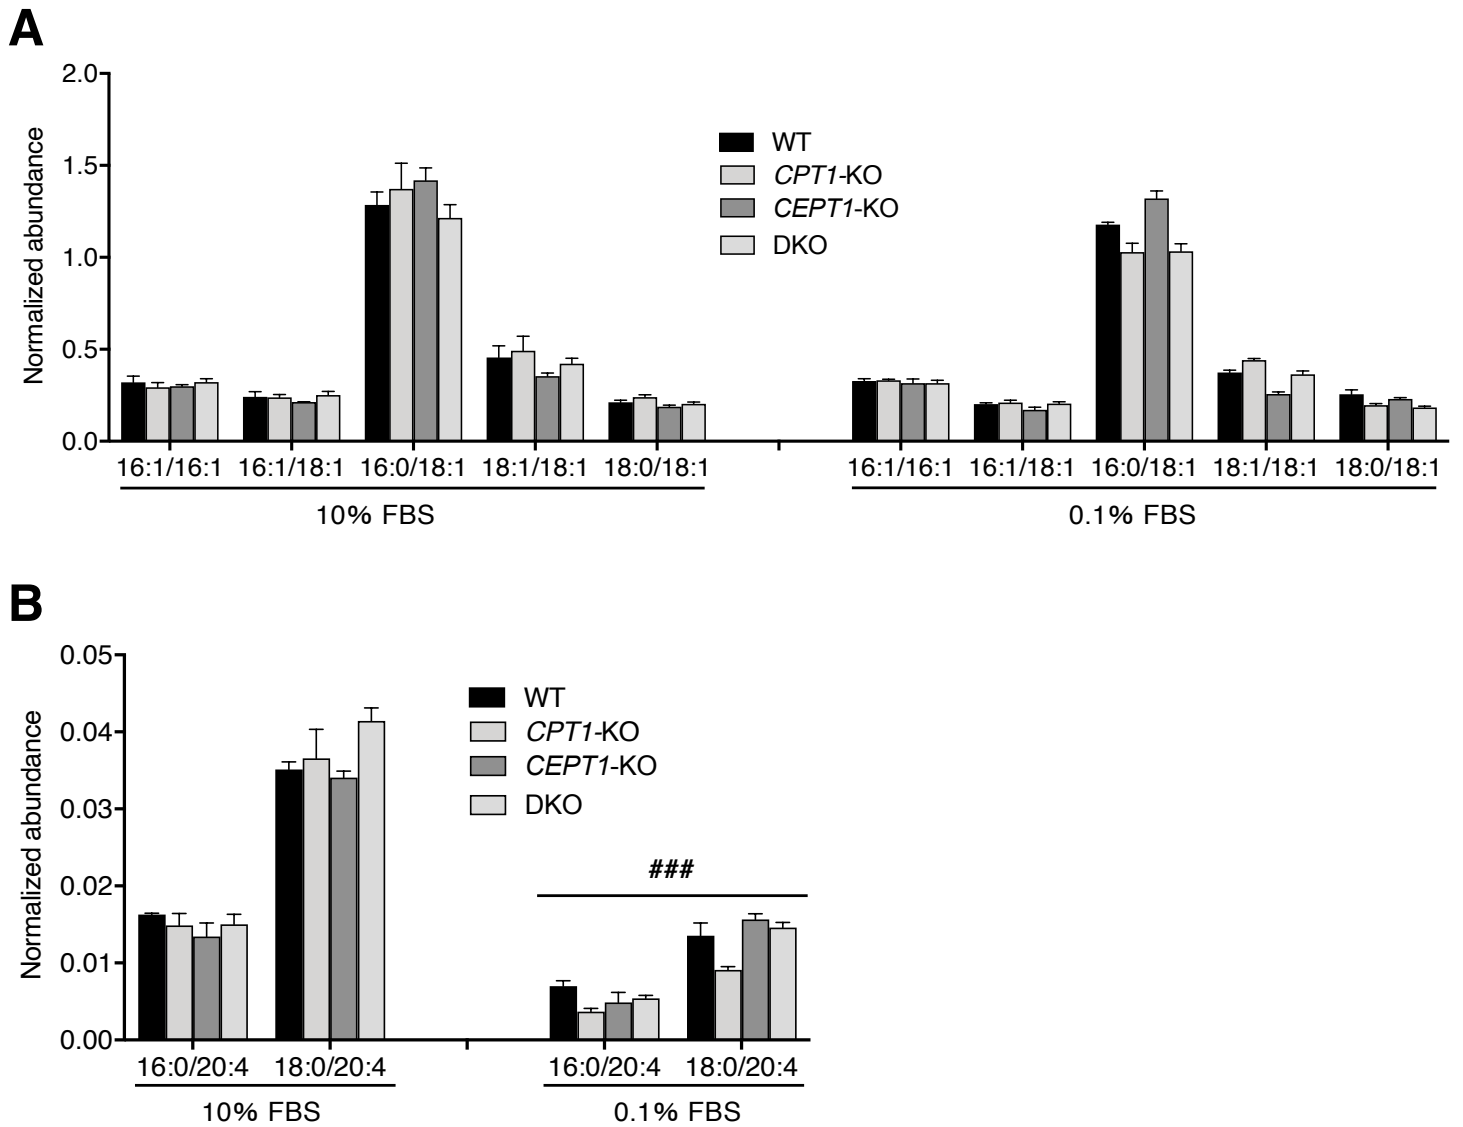

**Supplemental Fig. S8. Amount of endogenous DAG molecular species in WT, *CPT1*-KO, *CEPT1*-KO, and DKO cells cultured with 10% FBS or 0.1% FBS.**

Cells were cultured in HE100 medium containing 10% FBS or 0.1% FBS for 2 days. After lipids were extracted from the cells, the levels of DAG with palmitoleic acid or oleic acid (A) and arachidonic acid (B) were quantified using LC-MS/MS. Lipid levels were normalized by the amount of total cellular protein. Data are means  $\pm$  S.D. from three independent culture dishes. ### indicates  $P < 0.001$  as compared with 10% FBS. Statistical significance was determined using one-way ANOVA with Dunnett's post hoc test.
